# Supplementary material
Source: PubMed Central journal article supplement (PMC4760101)
Supplement: NIHMS757844-supplement-Supplemental_Figure_1.pdf [file NIHMS757844-supplement-Supplemental_Figure_1.pdf]

| Polymers incorporated in particles                                                |                                                                                    |                                                                                     |
|-----------------------------------------------------------------------------------|------------------------------------------------------------------------------------|-------------------------------------------------------------------------------------|
| PLGA                                                                              | Alkyne-Functionalized PLGA                                                         | Phenol-Containing PMMA                                                              |
| 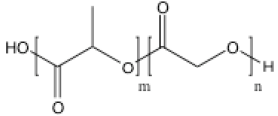 |   |  |
| Polymers immobilized on the surface of particles                                  |                                                                                    |                                                                                     |
| Linear azide-PEG                                                                  | Star azide-PEG                                                                     |                                                                                     |
|  |  |                                                                                     |

**Supplemental Figure 1:** The chemical structure of all polymers, incorporated into the particles or immobilized on the surface, used for studies.
